# Supplementary material for: Bacillus as a potential diagnostic marker for yellow tongue coating
Source: PubMed Central journal article supplement (PMC5006162; doi:10.1038/srep32496), 2016-08-31
Supplement: srep32496-s1.pdf [file srep32496-s1.pdf]

1 ***Bacillus* as a potential diagnostic marker for yellow tongue**  
2 **coating**

3 **Supporting Information Appendix**

4  
5 Juan Ye<sup>a,b</sup>, XuetingCai<sup>a,b</sup>, Jie Yang<sup>a,b</sup>, XiaoyanSun<sup>a,b</sup>, Chunping Hu<sup>a,b</sup>, JunquanXia<sup>a,b</sup>,  
6 JianpingShen<sup>a,b</sup>, Kelei Su<sup>a,b</sup>, Huaijiang Yan<sup>a,b</sup>, YuehuaXu<sup>b</sup>, Yiyan Zhang<sup>a,b</sup>, Sujie  
7 Zhang<sup>a,b</sup>, LijunYang<sup>a,b</sup>, HaoZhi<sup>a,b</sup>, Sizhi Paul Gao<sup>c</sup>, Qiang Yu<sup>d</sup>, Jingqing Hu<sup>e\*</sup>,  
8 PengCao<sup>a,b,e\*</sup>

9  
10 <sup>a</sup> Affiliated Hospital of Integrated Traditional Chinese and Western Medicine, Nanjing  
11 University of Chinese Medicine, Nanjing 210028, China

12 <sup>b</sup> Laboratory of Cellular and Molecular Biology, Jiangsu Province Academy of Traditional  
13 Chinese Medicine, Nanjing 210028, China

14 <sup>c</sup> Department of Medicine, Memorial Sloan-Kettering Cancer Center (MSKCC), New York  
15 10065, USA.

16 <sup>d</sup> Department of Pharmacology, Shanghai Institute of Materia Medica, Chinese Academy of  
17 Sciences, Shanghai 201203, China

18 <sup>e</sup> Institute of Basic Theory of Traditional Chinese Medicine, China Academy of Chinese  
19 Medicine Sciences, Beijing 100700, China

20  
21 **Correspondence**

22 Peng Cao

23 Laboratory of Cellular and Molecular Biology,  
24 Jiangsu Province Academy of Traditional Chinese Medicine  
25 100 Shizi Street, Hongshang Road  
26 Nanjing, Jiangsu, 210028  
27 China

28 Tel./fax: +86 25 85608666.

29 Email: pcao79@yahoo.com

30  
31 Jingqing Hu

32 Institute of Basic Theory of Traditional Chinese Medicine,  
33 China Academy of Chinese Medicine Sciences,  
34 16 Nanxiao Street, Dongzhimen Road  
35 Beijing, 100700  
36 China

37 Tel./fax: +86 10 64014411

38 Email: gcp306@126.com

39

40

41 **Supporting Figures**

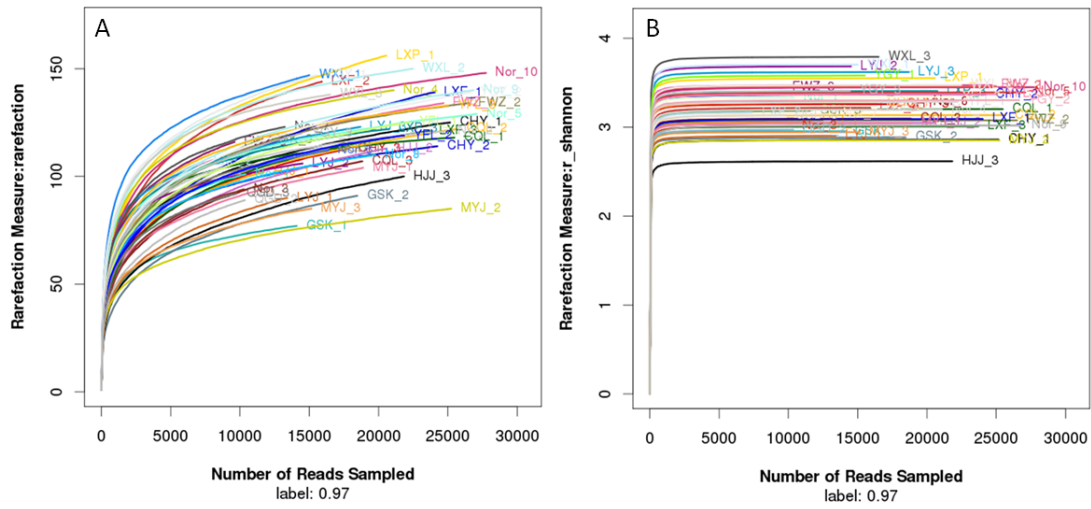

42

43 Fig.S1. Rarefaction curves (A) alpha diversity of all 43 samples based on species-level OTUs;  
 44 (B) Shannon rarefaction curves of 43 samples.

45

46

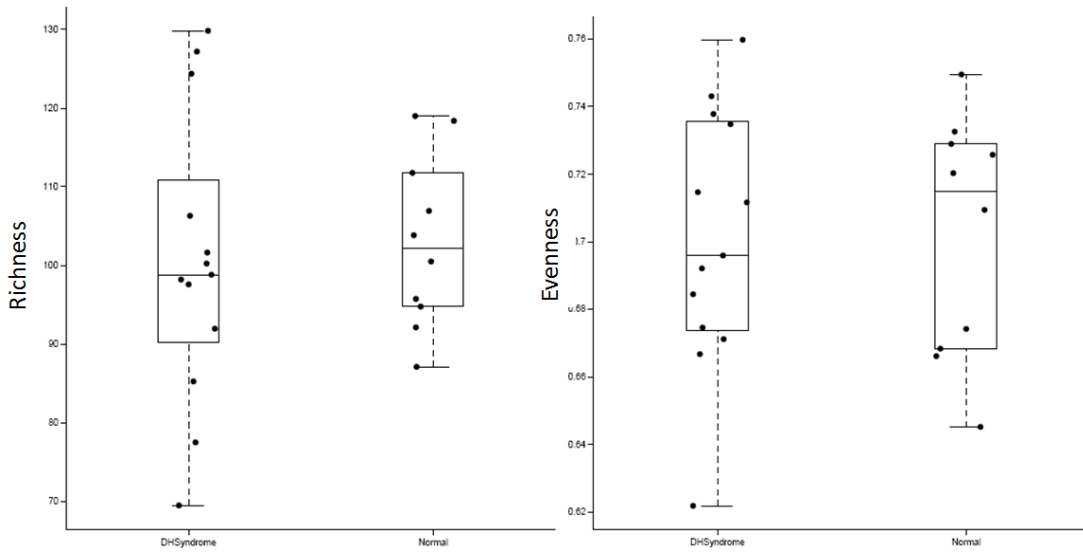

47

48 Fig.S2. Richness and evenness for the OUTs observed in this study for CEG yellow tongue  
 49 coating group (n=13) and healthy control (n=10) . By the Student's t-test, the two groups had no  
 50 significant difference in richness and evenness( $P=0.126$  and  $P=0.381$  respectively).

51

52

53

54

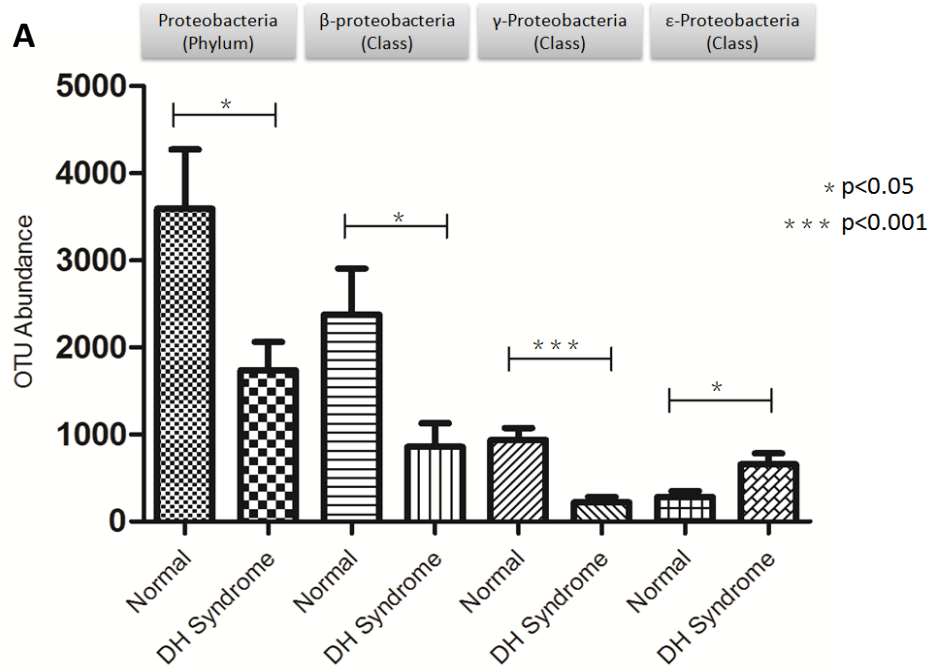

55  
56  
57

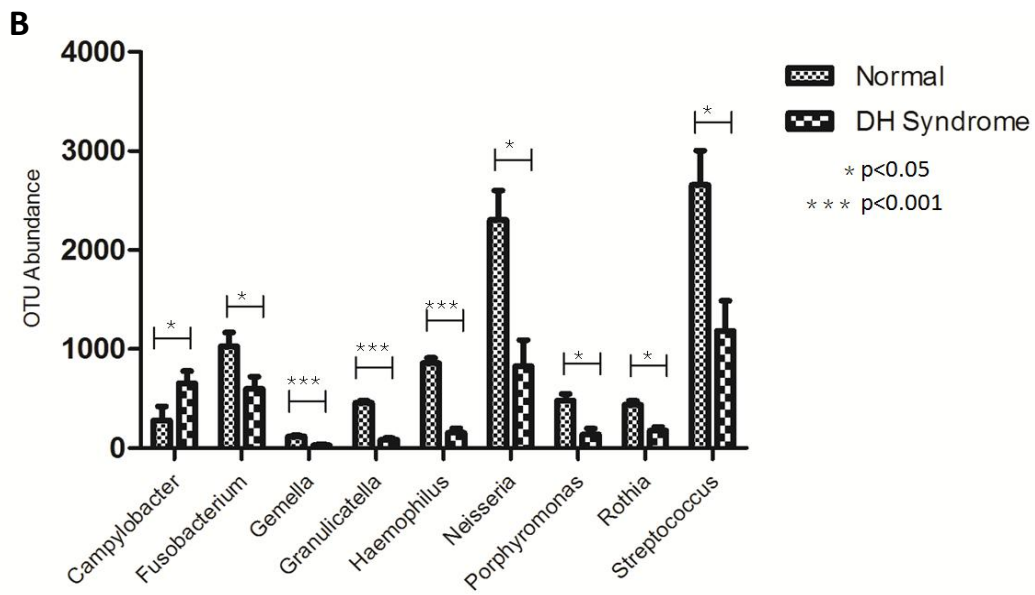

58  
59  
60  
61  
62  
63  
64  
65  
66  
67  
68

Fig.S3. Abundance of OTUs in patients with CEG yellow tongue coating and healthy controls. A:at Pylum level; B:at genus level Student's *t*-test was used; mean  $\pm$  S.E.M. ("YTC":yellow tongue coating)

69

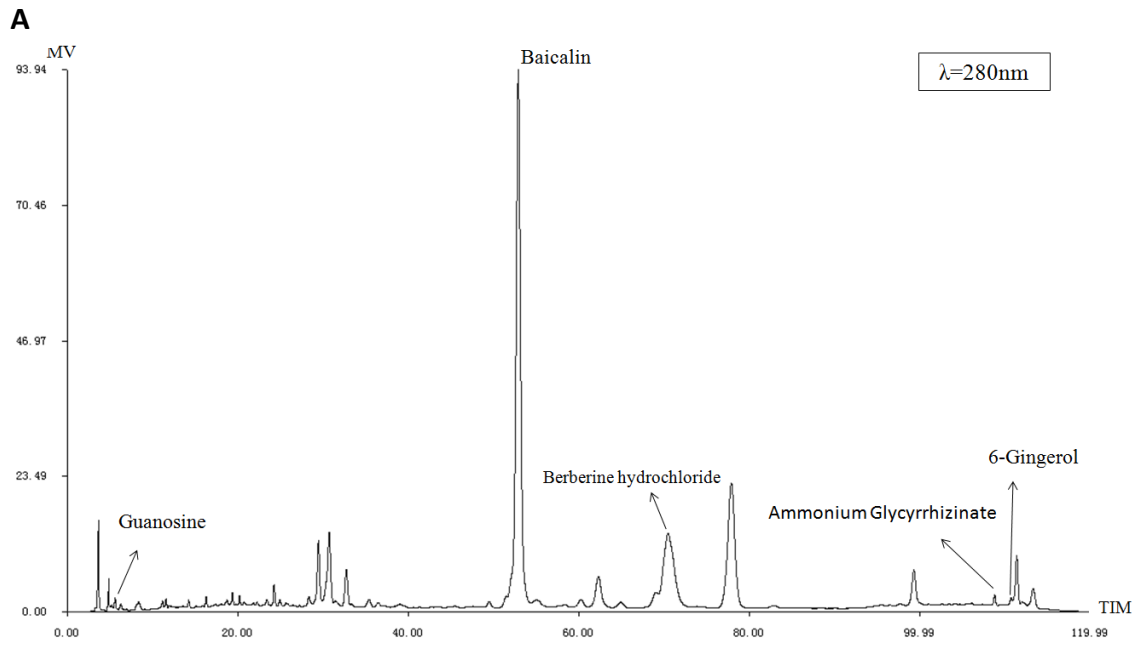

70

71

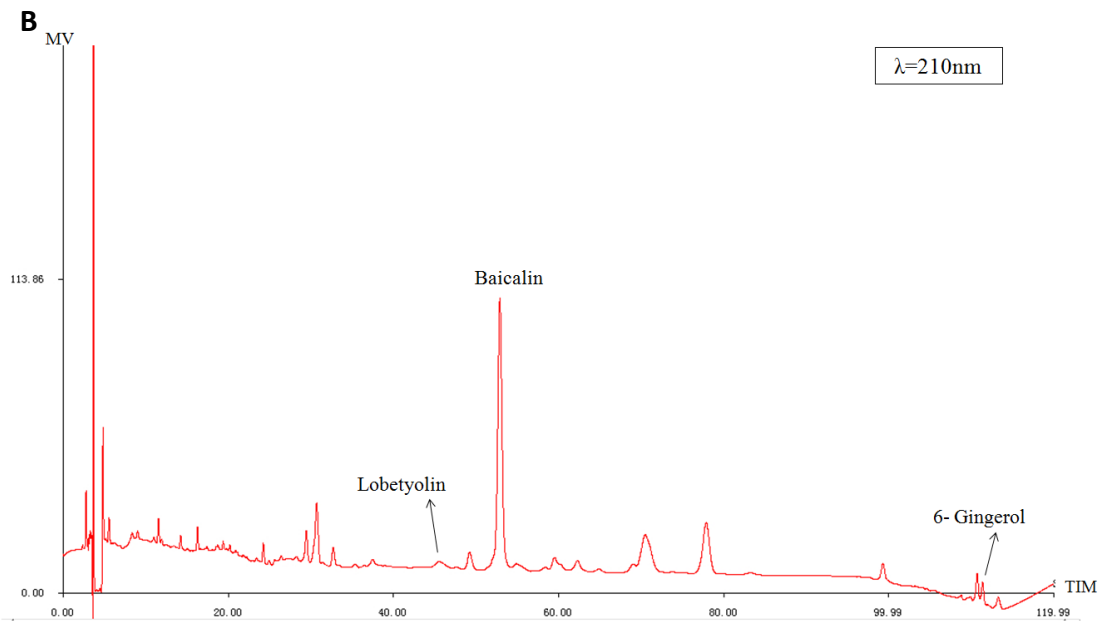

72

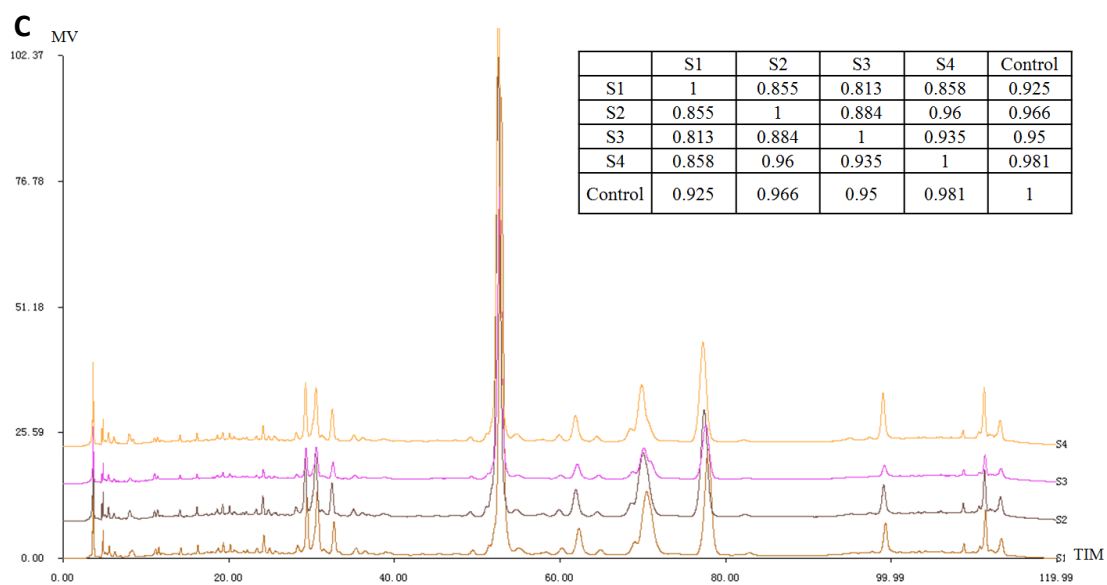

73  
74  
75  
76  
77  
78  
79  
80  
81  
82  
83  
84  
85  
86  
87  
88  
89  
90  
91  
92

Fig.S4. Quality control of Ban Xia Xie Xin decoction. A: HPLC graphs of main chemicals in extract preparations at 280nm; B : HPLC graphs of main chemicals in extract preparations at 210nm; C: HPLC graphs of Ban Xia Xie Xin water extract preparations after 7 days of storage and between 2 batches. (S1: the first batch herbs water extract; S2:S1 stored for 7 days at 4°C ; S3: the second batch herbs water extract; S4: S3 stored for 7 days at 4°C . ) The table shows the similarity of each group.

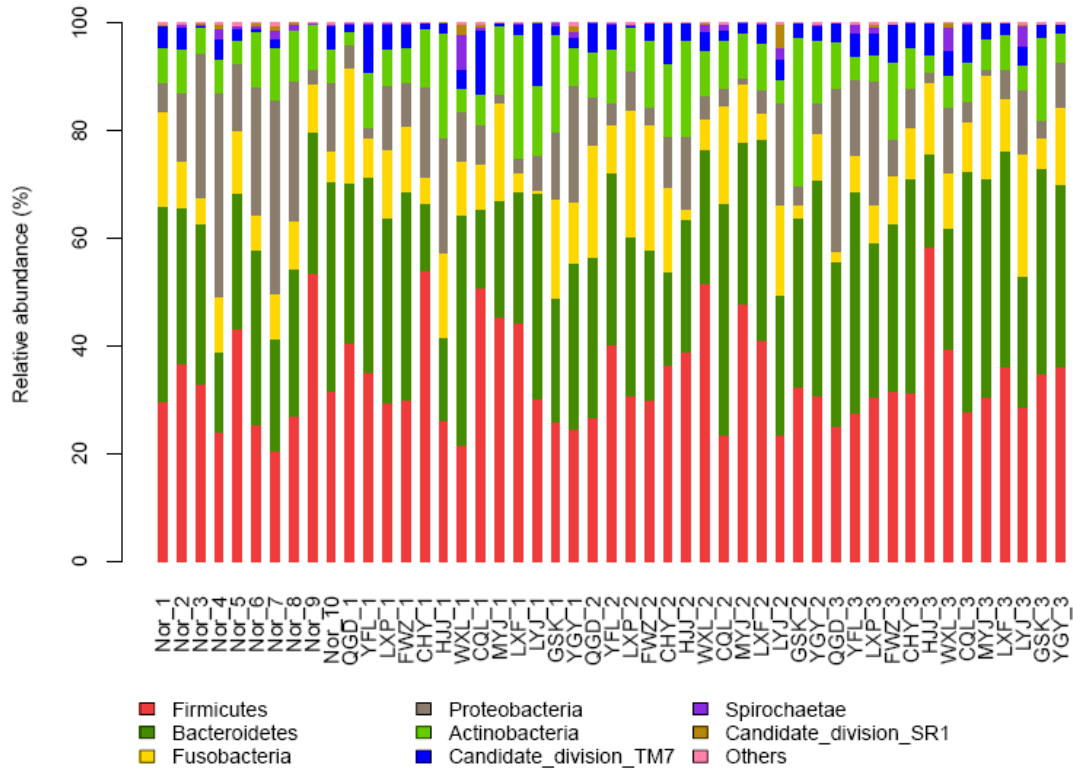

93  
94  
95  
96  
97

Fig.S5. 16S rRNA sequencing analysis and taxonomy classification of the tongue coating microbiome at the phylum level( All 4 groups)

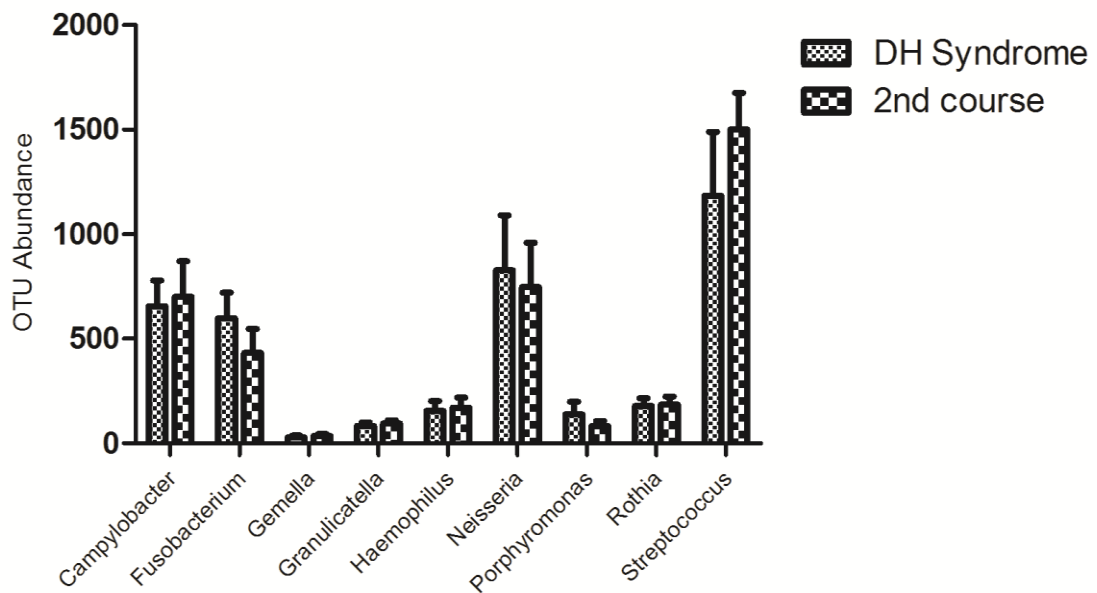

98  
99  
100  
101  
102  
103

Fig.S6. Abundance of OTUs in patients with CEG yellow tongue coating and 2<sup>nd</sup> course treatment group (No significance were found)(“YTC”:yellow tongue coating)

104 **Supporting Tables**

105

106 Table S1. Demographic information of the study participants in discover phase

| Demographic variable    | Healthy volunteers<br>(n=10) | CEG patients with<br>yellow tongue coating<br>(n=13) |
|-------------------------|------------------------------|------------------------------------------------------|
| Age(Mean±SD)            | 27.7±7.9                     | 52.4±11.6                                            |
| Male(%)                 | 3(30)                        | 7(53.8)                                              |
| Female(%)               | 7(70)                        | 6(46.2)                                              |
| Smoking(%)              | 0                            | 2                                                    |
| Helicobacter pylori (%) | 0                            | 0                                                    |

107

108

Table S2 Demographic information of the study participants in validation phase

| Demographic variable | Healthy<br>volunteers<br>(n=11)    | Patients from<br>Gastroenterology dept<br>(n=26) |                                      | Patients from<br>Cardiovascular dept<br>(n=14) |                                     |
|----------------------|------------------------------------|--------------------------------------------------|--------------------------------------|------------------------------------------------|-------------------------------------|
|                      | White<br>tongue<br>coating<br>only | Yellow<br>tongue<br>coating<br>(n=16)            | White<br>tongue<br>coating<br>(n=10) | Yellow<br>tongue<br>coating<br>(n=6)           | White<br>tongue<br>coating<br>(n=8) |
| Age(Mean±SD)         | 54.9±5.1                           | 58.6±10.3                                        | 56.6±9.1                             | 65.8±11.7                                      | 68.6±13.9                           |
| Male(%)              | 1 (9.09)                           | 5 (31.25)                                        | 6 (60)                               | 3 (50)                                         | 2 (25)                              |
| Female(%)            | 10 (90.91)                         | 11 (68.75)                                       | 4 (40)                               | 3 (50)                                         | 6(75)                               |
| Smoking(%)           | 0                                  | 3(18.75)                                         | 0                                    | 0                                              | 2(25)                               |

Table S3 The results of staining microscopy

| NO.  | Disease                    | Tongue coating figure                                                               | Tongue coating color | Phe agar                                                                             | Gram-staining                                                                         | Bacillus positive/negative |
|------|----------------------------|-------------------------------------------------------------------------------------|----------------------|--------------------------------------------------------------------------------------|---------------------------------------------------------------------------------------|----------------------------|
| GI-1 | chronic atrophic gastritis |    | yellow               |    |    | positive                   |
| GI-2 | gastritis, bile reflux     |    | yellow               |    |    | positive                   |
| GI-3 | chronic gastritis          |   | yellow               |   |   | positive                   |
| GI-4 | chronic erosive gastritis  |  | yellow               |  |  | positive                   |



|      |                            |                                                                                    |        |                                                                                     |                                                                                      |          |
|------|----------------------------|------------------------------------------------------------------------------------|--------|-------------------------------------------------------------------------------------|--------------------------------------------------------------------------------------|----------|
| GI-5 | chronic atrophic gastritis |   | yellow |   |   | positive |
| GI-6 | chronic atrophic gastritis |   | yellow |   |   | positive |
| GI-7 | chronic atrophic gastritis |   | yellow |   |   | positive |
| GI-8 | chronic atrophic gastritis |  | yellow |  |  | positive |

|       |                                               |                                                                                    |        |                                                                                     |                                                                                       |          |
|-------|-----------------------------------------------|------------------------------------------------------------------------------------|--------|-------------------------------------------------------------------------------------|---------------------------------------------------------------------------------------|----------|
| GI-9  | chronic erosive gastritis                     |   | yellow |   |    | positive |
| GI-10 | chronic atrophic gastritis                    |   | yellow |   |    | positive |
| GI-11 | superficial gastritis                         |   | yellow |   |    | positive |
| GI-12 | gastric polyposis, duodenal bulb inflammation |  | yellow |  |  | positive |

|       |                            |                                                                                    |        |                                                                                     |   |          |
|-------|----------------------------|------------------------------------------------------------------------------------|--------|-------------------------------------------------------------------------------------|---|----------|
| GI-13 | chronic atrophic gastritis | 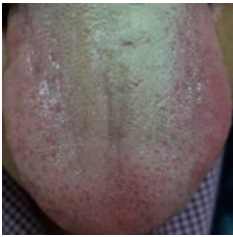  | yellow |   | \ | negative |
| GI-14 | chronic erosive gastritis  |   | yellow |   | \ | negative |
| GI-15 | chronic atrophic gastritis |   | yellow |   | \ | negative |
| GI-16 | chronic erosive gastritis  |  | yellow |  | \ | negative |

|       |                                                |                                                                                    |       |                                                                                      |   |          |
|-------|------------------------------------------------|------------------------------------------------------------------------------------|-------|--------------------------------------------------------------------------------------|---|----------|
| GI-17 | superficial<br>gastritis,gallbladder<br>polyps |   | white |    | \ | negative |
| GI-18 | bile reflux.Ileocecal<br>resection             |   | white |    | \ | negative |
| GI-19 | superficial gastritis                          |   | white |    | \ | negative |
| GI-20 | gastric ulcer                                  |  | white |  | \ | negative |

|       |                            |                                                                                     |       |                                                                                      |   |          |
|-------|----------------------------|-------------------------------------------------------------------------------------|-------|--------------------------------------------------------------------------------------|---|----------|
| GI-21 | chronic atrophic gastritis |    | white |    | \ | negative |
| GI-22 | enteritis                  |    | white |    | \ | negative |
| GI-23 | chronic atrophic gastritis |    | white |    | \ | negative |
| GI-24 | chronic atrophic gastritis |  | white |  | \ | negative |

|       |                            |                                                                                     |        |                                                                                      |                                                                                       |          |
|-------|----------------------------|-------------------------------------------------------------------------------------|--------|--------------------------------------------------------------------------------------|---------------------------------------------------------------------------------------|----------|
| GI-25 | chronic atrophic gastritis |    | white  |    | \                                                                                     | negative |
| GI-26 | gastric ulcer              |    | white  |    | \                                                                                     | negative |
| Ca-1  | Coronary heart disease     |    | yellow |    |    | positive |
| Ca-2  | Coronary heart disease     |  | yellow |  |  | positive |

|      |                        |                                                                                     |        |                                                                                      |                                                                                     |          |
|------|------------------------|-------------------------------------------------------------------------------------|--------|--------------------------------------------------------------------------------------|-------------------------------------------------------------------------------------|----------|
| Ca-3 | chronic stroke         |    | yellow |    |  | positive |
| Ca-4 | Coronary heart disease |    | yellow |    |  | positive |
| Ca-5 | Coronary heart disease |    | yellow |    | \                                                                                   | negative |
| Ca-6 | Coronary heart disease |  | yellow |  | \                                                                                   | negative |

|       |                        |                                                                                     |       |                                                                                      |   |          |
|-------|------------------------|-------------------------------------------------------------------------------------|-------|--------------------------------------------------------------------------------------|---|----------|
| Ca-7  | Coronary heart disease |    | white |    | \ | negative |
| Ca-8  | miocardial infarction  |    | white |    | \ | negative |
| Ca-9  | Coronary heart disease |    | white |    | \ | negative |
| Ca-10 | hyperuricemia          |  | white |  | \ | negative |



|       |                        |                                                                                    |       |                                                                                      |   |          |
|-------|------------------------|------------------------------------------------------------------------------------|-------|--------------------------------------------------------------------------------------|---|----------|
| Ca-11 | arrhythmia             |   | white |    | \ | negative |
| Ca-12 | Coronary heart disease |   | white |    | \ | negative |
| Ca-13 | Coronary heart disease |   | white |    | \ | negative |
| Ca-14 | Coronary heart disease |  | white |  | \ | negative |

|     |   |                                                                                    |       |                                                                                      |   |          |
|-----|---|------------------------------------------------------------------------------------|-------|--------------------------------------------------------------------------------------|---|----------|
| H-1 | \ |   | white |    | \ | negative |
| H-2 | \ |   | white |    | \ | negative |
| H-3 | \ |   | white |    | \ | negative |
| H-4 | \ |  | white |  | \ | negative |

H-5

\

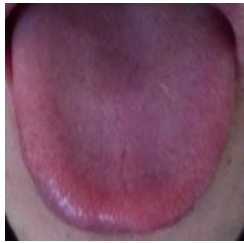

white

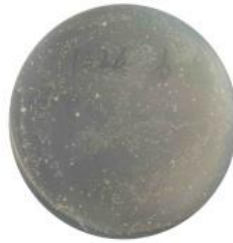

\

negative

H-6

\

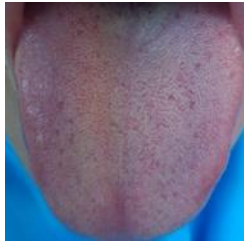

white

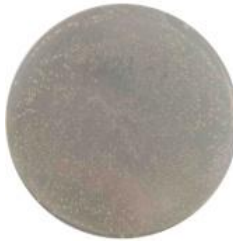

\

negative

H-7

\

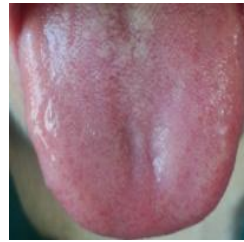

white

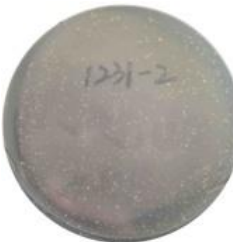

\

negative

H-8

\

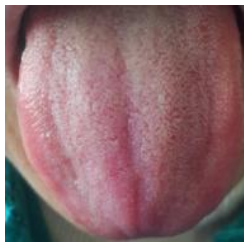

white

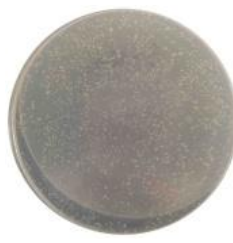

\

negative

|      |   |                                                                                   |       |                                                                                    |   |          |
|------|---|-----------------------------------------------------------------------------------|-------|------------------------------------------------------------------------------------|---|----------|
| H-9  | \ |  | white |  | \ | negative |
| H-10 | \ |  | white |  | \ | negative |
| H-11 | \ |  | white |  | \ | negative |

---

Note: "GI-": Samples from Gastroenterology department; "Ca-": Samples from Cardiovascular department; "H-": Samples from healthy volunteers
